# Supplementary material
Source: PubMed Central journal article supplement (PMC7953331)
Supplement: jamaophthalmol-e210114-s001.pdf [file jamaophthalmol-e210114-s001.pdf]

## Supplementary Online Content

Lindeke-Myers A, Zhao PYC, Meyer BI, et al. Patient perceptions of SARS-CoV-2 exposure risk and association with continuity of ophthalmic care. *JAMA Ophthalmol*. Published online March 11, 2021. doi:10.1001/jamaophthalmol.2021.0114

**eFigure.** Survey Regarding Time-Sensitive Eye Care During the COVID-19 Pandemic

This supplementary material has been provided by the authors to give readers additional information about their work.

**eFigure. Survey Regarding Time-Sensitive Eye Care During the COVID-19 Pandemic**

**Q1. In what setting do you live:**

Independently    An assisted living community    A nursing home or skilled nursing facility    Other

**Q2. Who do you live with?**

Alone    With a spouse/domestic partner    With a child or children    Other

**Q3. In general, would you say your overall health is:**

Excellent    Very good    Good    Fair    Poor

**Q4. At the present time, would you say your eyesight (with glasses or contact lenses, if you wear them) is:**

Excellent    Good    Fair    Poor    Very poor    Are you completely blind?

**Q5. How concerned are you about permanent vision loss from missed eye injections due to the novel coronavirus, also known as COVID-19?**

Very concerned    Moderately concerned    Somewhat concerned    Slightly concerned    Not at all concerned

**Q6. Do you personally know anyone who has gotten the COVID-19 infection?**

Yes    No

**Q7. How likely do you feel you are to be exposed to COVID-19 when you visit the eye clinic for your eye injection?**

Extremely likely    Likely    Neutral    Unlikely    Extremely unlikely

**Q8. In order to maintain your current level of vision, what chance of being exposed to COVID-19 would you be willing to accept?**

1 in 10    1 in 100    1 in 1,000    1 in 10,000    1 in 100,000    1 in 1,000,000

or Not willing to assume any risk

**I am going to ask you two questions about vision and living a long life. These questions may sound unusual, but they help us understand how much people value their vision. I would appreciate your best guess on these questions. There is no “right” answer and each person’s answer will be different.**

**\*Q9. How many more years do you expect to live? \_\_\_\_\_**

**\*Q10. (read A or B depending on visual acuity)**

**A. (if 20/25 or better in both eyes) Of your remaining \_\_\_\_\_ years, how many would you be willing to trade in order to guarantee good vision in both eyes? \_\_\_\_\_**

**B. (if worse than 20/30 in at least one eye). Of your remaining \_\_\_\_\_, how many would you be willing to trade for permanent, perfect vision (20/20) in both eyes? \_\_\_\_\_**

**Q11. Are you currently employed?**

Yes    No

**Q12. Which of the following describes your level of education?**

Some high school    Finished high school    Some college    Finished college    Advanced degree

**Q13. Which of the following best describes your race or ethnicity?**

White/Caucasian      Black/African-American      Asian/Pacific Islander      Hispanic/Latino      Other

\*Q9 and Q10 will be reported separately and are not included in this manuscript

\*\*For the multivariate regression analysis, questions were consolidated into pre-specified binary response categories deemed *a priori* to be clinically meaningful by the investigators.

Q1: Independently vs. Assisted living, Nursing home, or Other

Q2: Alone vs. With spouse/domestic partner, With a child or children, or Other

Q3: Fair or Poor vs. Good, Very good, or Excellent

Q4: Fair, Very poor, Poor, or Completely blind vs. Fair, Good, or Excellent

Q5: Very concerned, Moderately concerned vs. Somewhat concerned, Slightly concerned, or Not at all concerned

Q7: Extremely likely, Likely vs. Neutral, Unlikely, Extremely unlikely

Q8: 1:100,000, 1:1,000,000, or Not willing to assume any risk vs. 1:10, 1:100, 1:1000, or 1:10,000

Q12: Finished college or Advanced degree vs. Some high school, Finished high school, or Some college
